# Supplementary material for: Atomic-scale structure of misfit dislocations in CeO2/MgO heterostructures and thermodynamic stability of dopant–defect complexes at the heterointerface
Source: Royal Society of Chemistry journal article supplement (doi:10.1039/c9cp03727f), 2019-01-01
Supplement: c9cp03727f1.pdf [file c9cp03727f1.pdf]

# Atomic-scale Structure of Misfit Dislocations in CeO<sub>2</sub>/MgO Heterostructure and Thermodynamic Stability of Dopant-defect Complexes at the Heterointerface

Pratik P. Dholabhai

*School of Physics and Astronomy  
Rochester Institute of Technology  
Rochester, NY 14623*

## Supplementary Information

**Figure S1.** *Illustration of few stable  $M-V_o^{\bullet\bullet}-M$  clusters with 1NN–2NN arrangement in the vicinity of Layer-1. Figure details are similar to **Figure 4** in the main manuscript. For each dopant species, the energy (eV) for a particular cluster of the respective number is given in **Table S1**. Color scheme for Ce, Mg, and O ions is shown below the figure.*

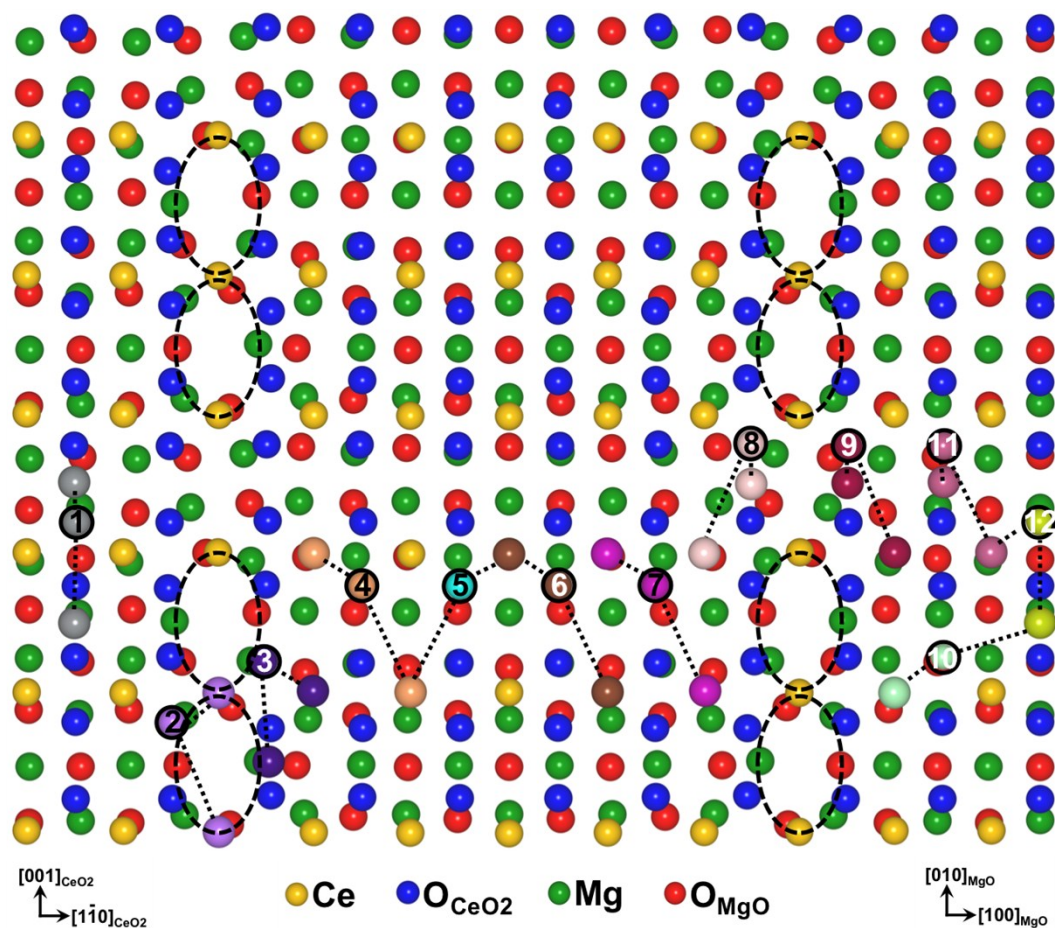

**Table S1.** For various trivalent dopants, energy (eV) for the respective  $M-V_{\text{O}}^{\bullet\bullet}-M$  cluster number with 1NN-2NN arrangement in Layer-1, as displayed in **Figure S1**. Energies are scaled so that 0.0 eV indicates the most favorable cluster arrangement.

| $M-V_{\text{O}}^{\bullet\bullet}-M$<br>cluster<br>number | Y (eV) | Gd (eV) | Sm (eV) | La (eV) |
|----------------------------------------------------------|--------|---------|---------|---------|
| 1                                                        | 3.72   | 3.94    | 4.08    | 4.71    |
| 2                                                        | 2.95   | 3.17    | 3.30    | 3.64    |
| 3                                                        | 2.92   | 3.09    | 3.23    | 3.75    |
| 4                                                        | 0.54   | 0.76    | 0.86    | 2.01    |
| 5                                                        | 0.34   | 0.47    | 0.57    | 0.89    |

|           |      |      |      |      |
|-----------|------|------|------|------|
| <b>6</b>  | 0.32 | 0.46 | 0.55 | 0.85 |
| <b>7</b>  | 0.43 | 0.59 | 0.74 | 1.03 |
| <b>8</b>  | 3.14 | 3.50 | 3.66 | 4.25 |
| <b>9</b>  | 1.02 | 1.20 | 1.24 | 1.56 |
| <b>10</b> | 0.34 | 0.50 | 0.58 | 0.82 |
| <b>11</b> | 0.41 | 0.44 | 0.44 | 0.56 |
| <b>12</b> | 2.37 | 2.44 | 2.44 | 2.55 |
